# Supplementary material
Source: Research Square preprint supplement (doi:10.21203/rs.3.rs-8087326/v1)
Supplement: Supplementary file 1 [file f94a89b57861b01eae574a50.docx]

1. **Figure1**
2. **Figure 1A, panel 1 (METTL14)**
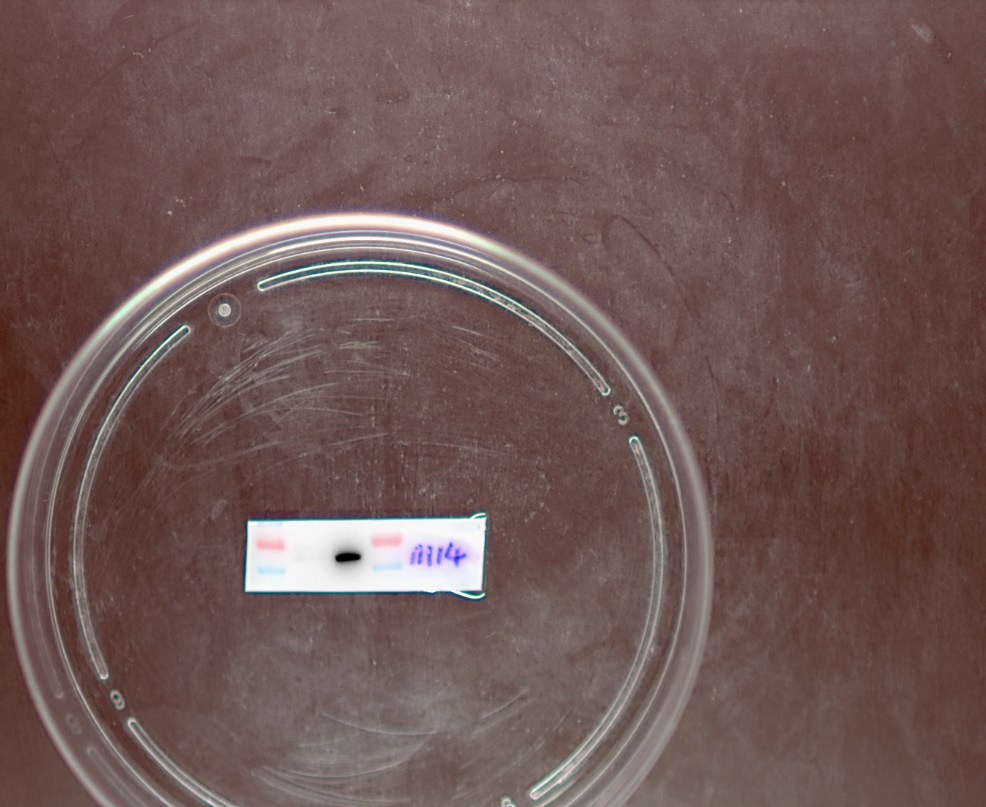

3. **Figure 1A, panel 2(GAPDH)**
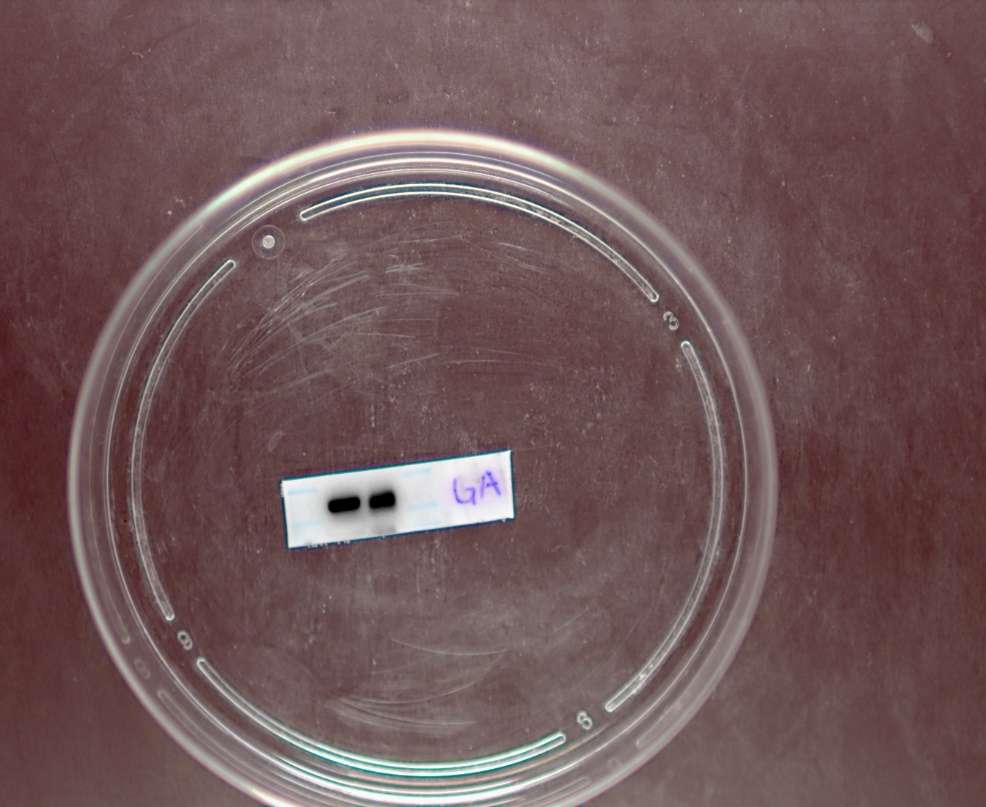

4. **Full-length gel**
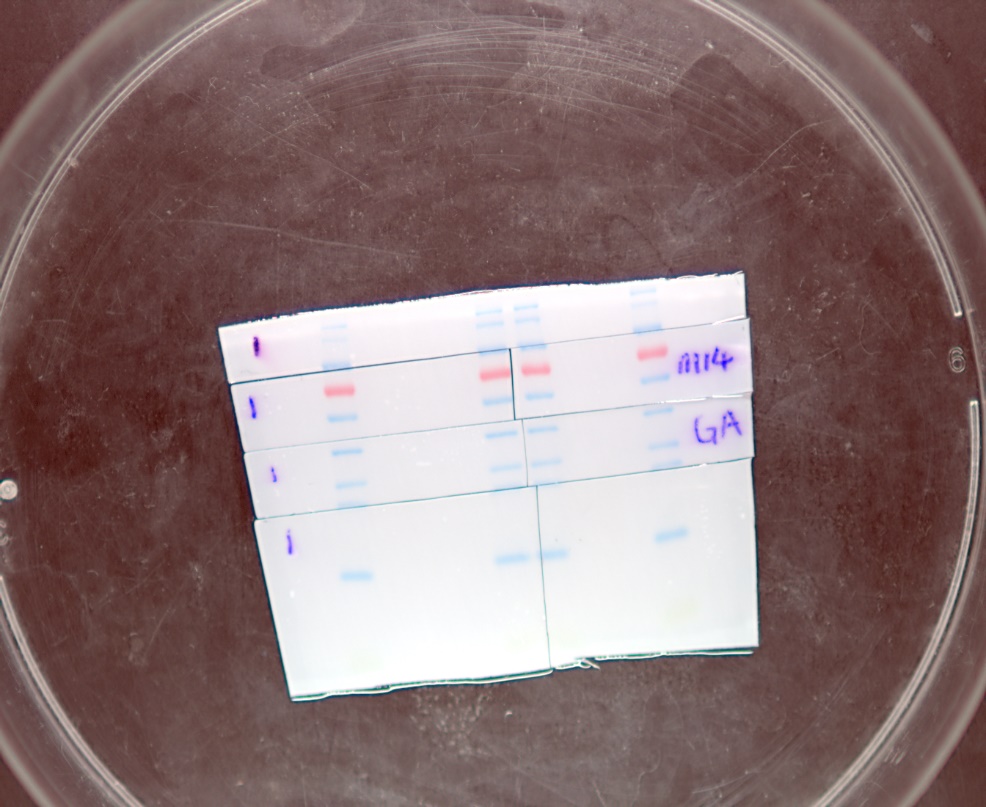

5. **Figure2**
6. **Figure 2A, panel 1 (METTL14)
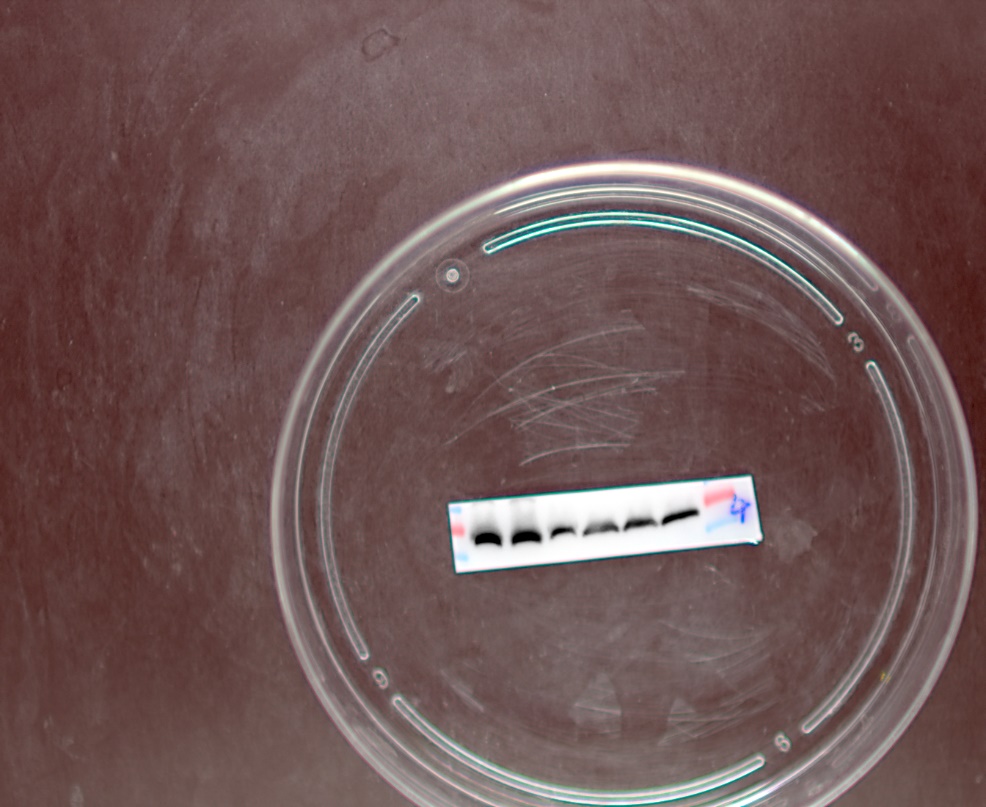
**
7. **Figure 2A, panel 2 (GAPDH)
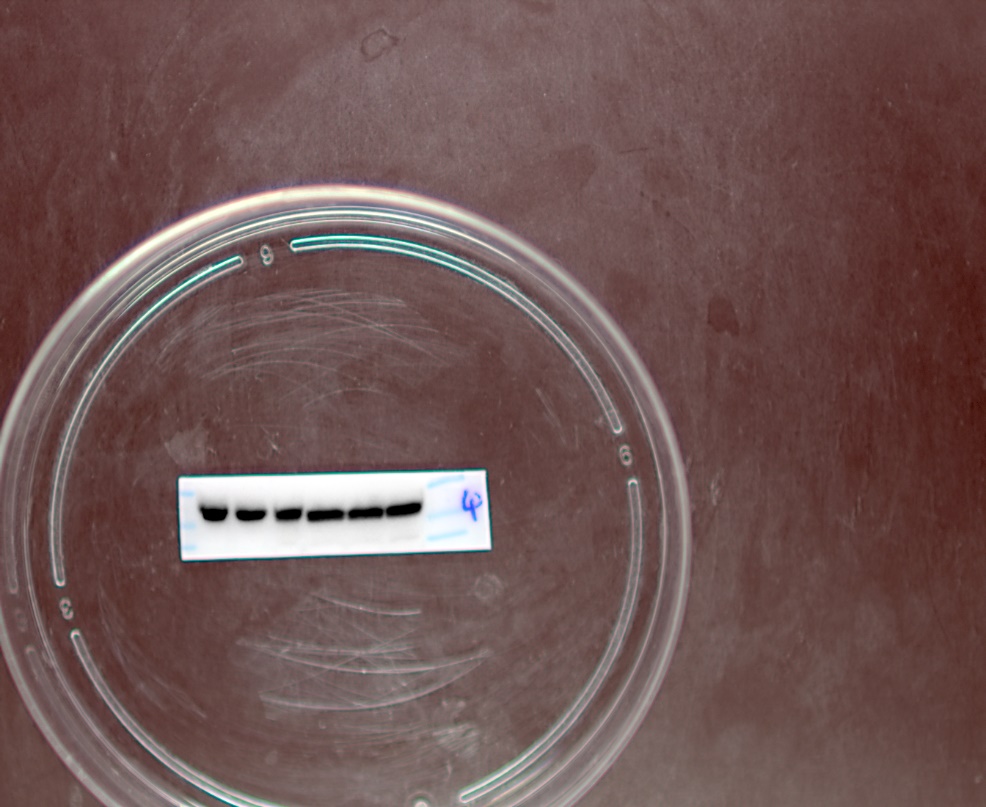
**
8. **Full-length gel
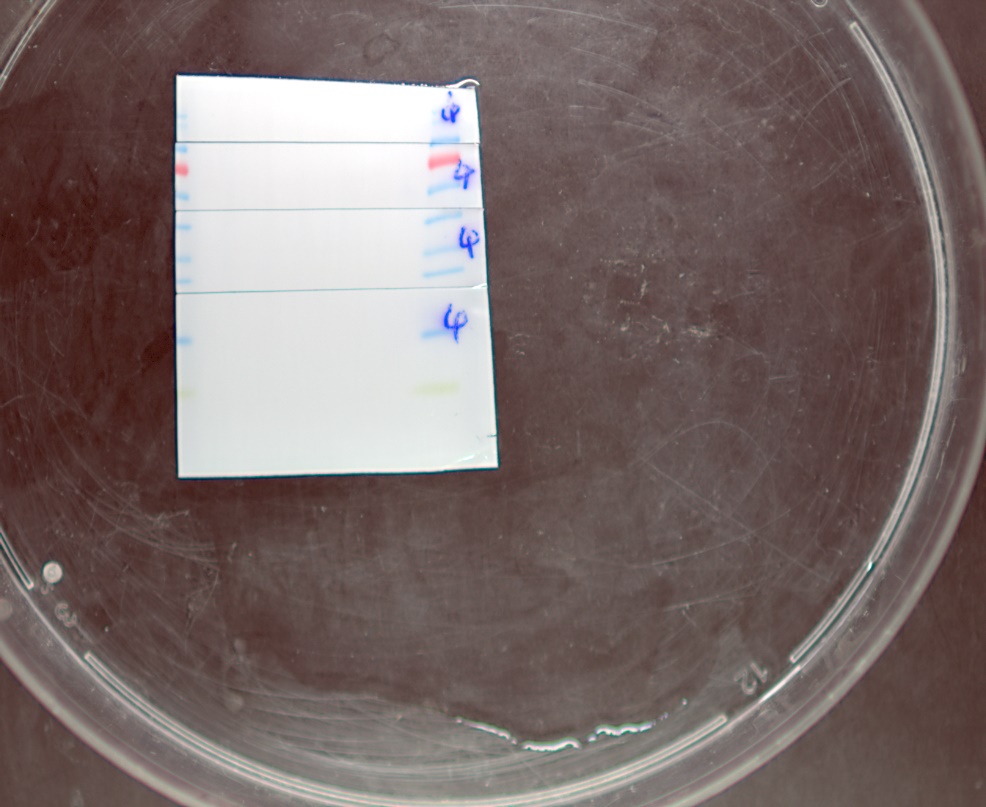
**
9. **Figure9-** **MMP9**
10. **Figure 9B , panel 1 (MMP9)**

**
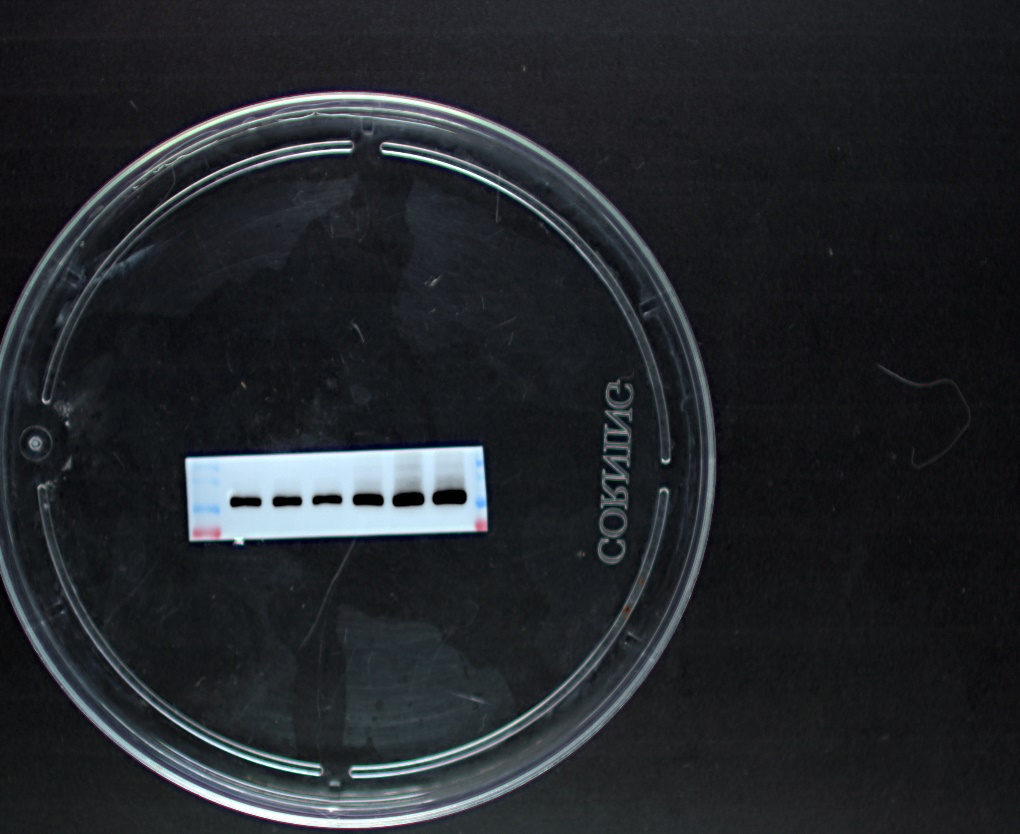
**

1. **Figure 9B, panel 2 (GAPDH)
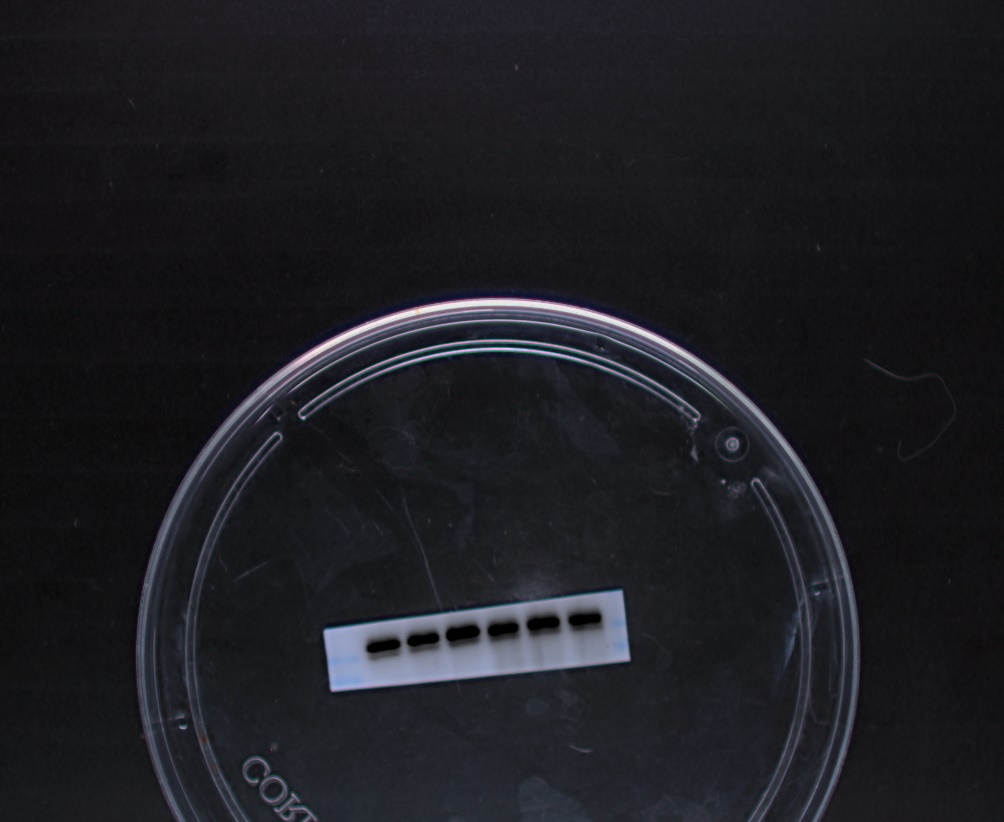
**
2. **Full-length gel
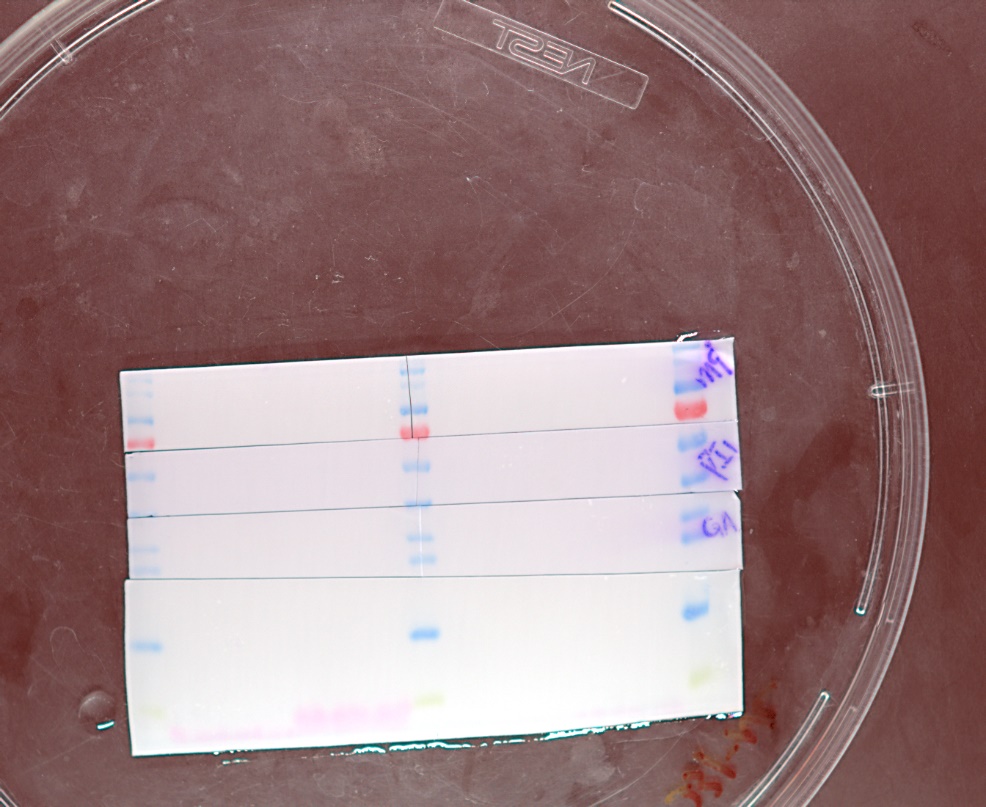
**

**四. Figure9- SERPINE1**

**1. Figure 9B , panel 1 (SERPINE1)
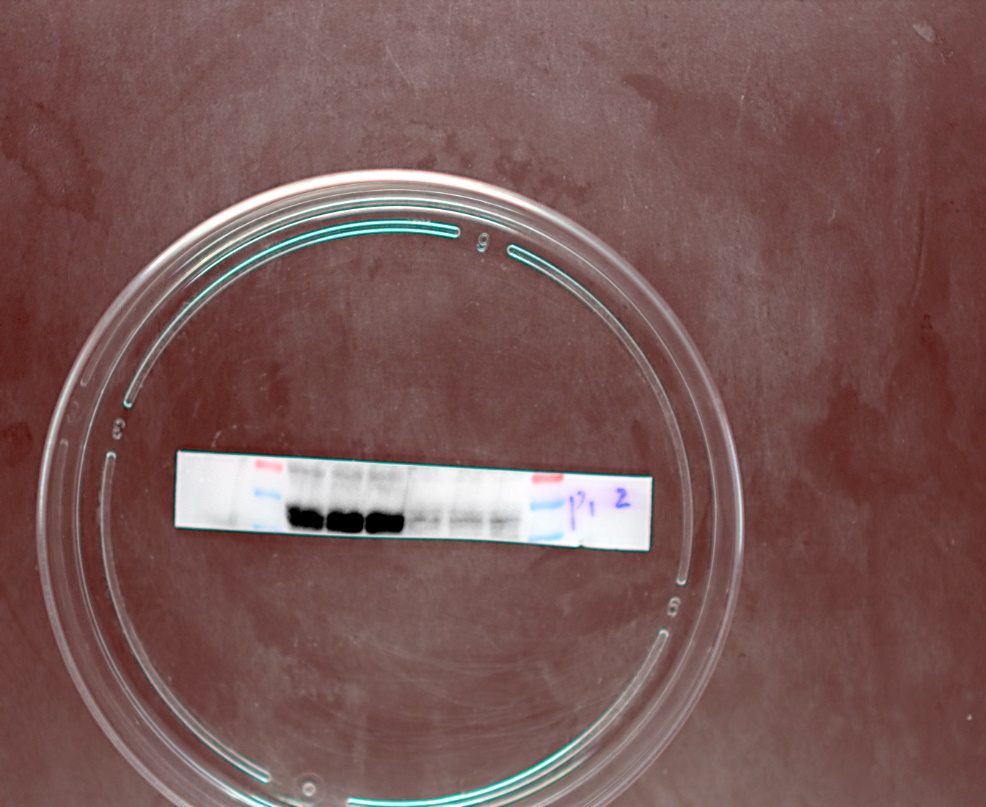
**

**2. Figure 9B , panel 2 (GAPDH)
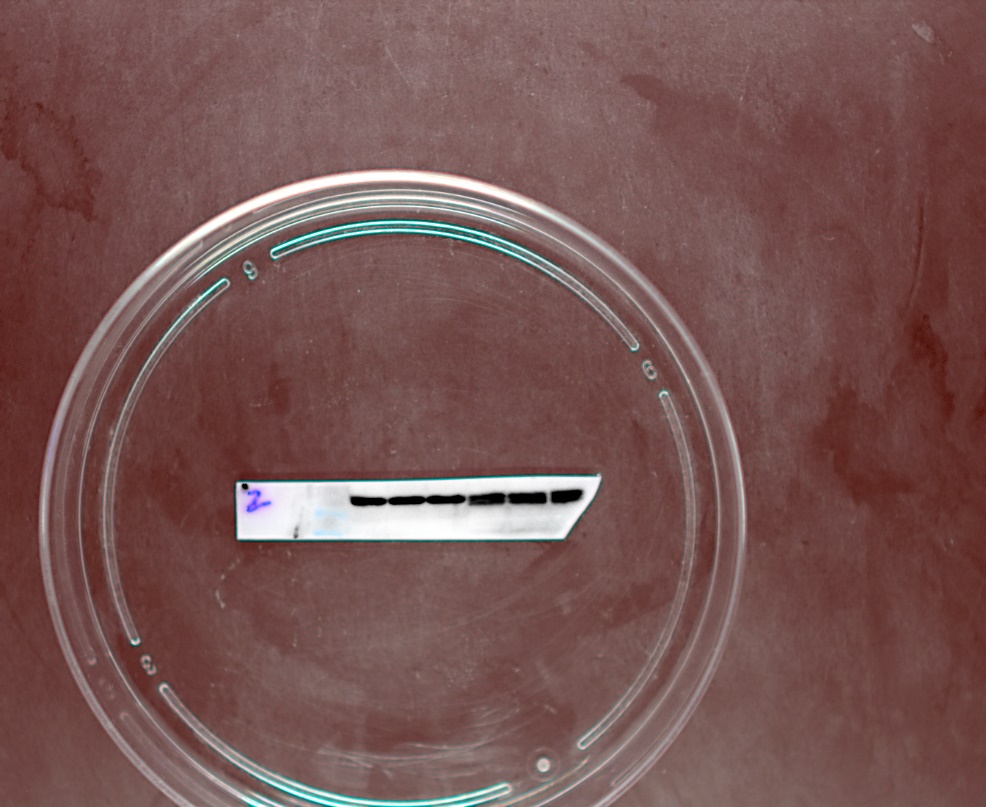
**

**3.Full-length gel
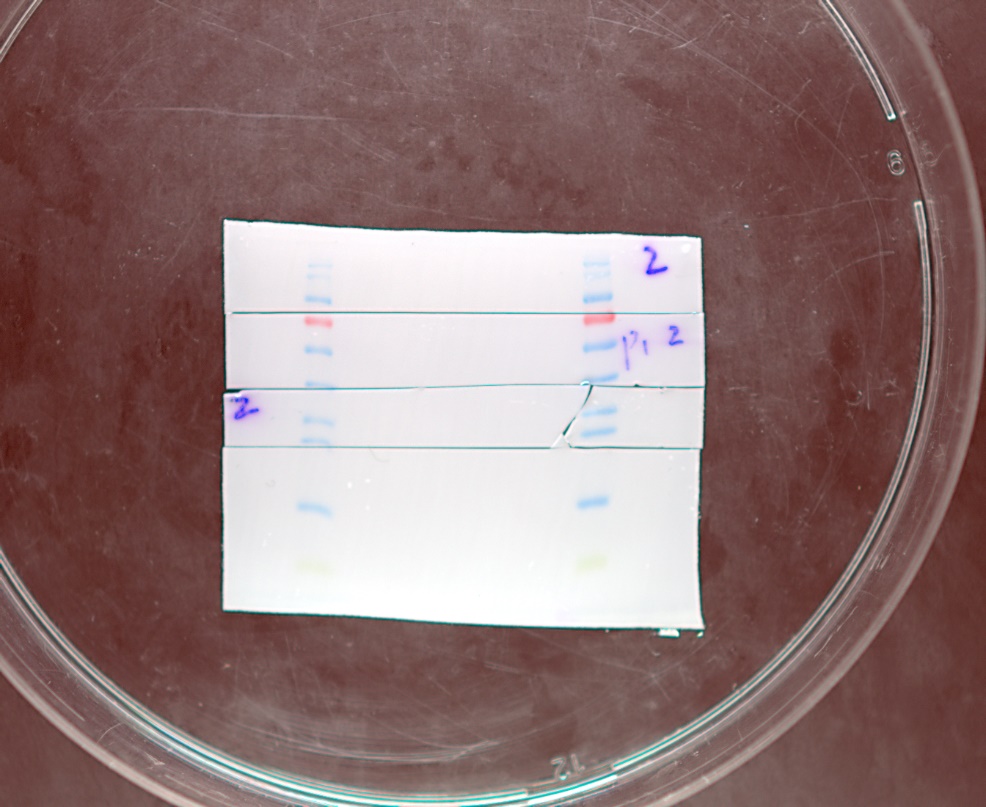
**

**五. Figure9-** **AGT**

**1. Figure 9B , panel 1 (AGT)
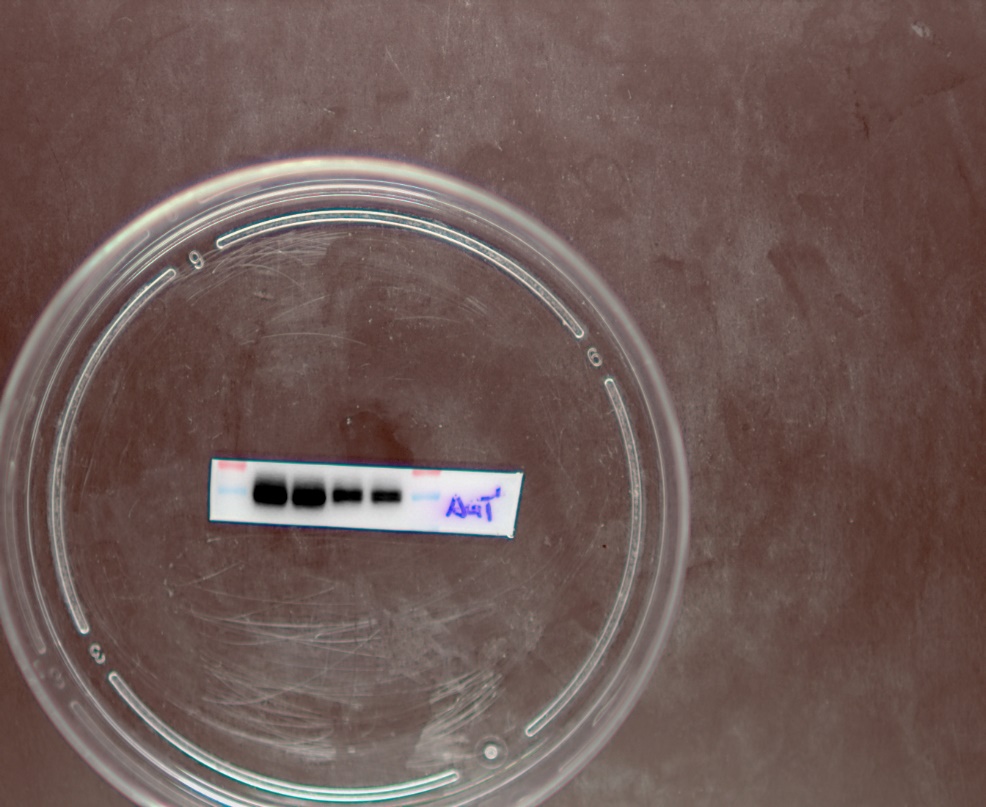
**

**2. Figure 9B , panel 2 (GAPDH)
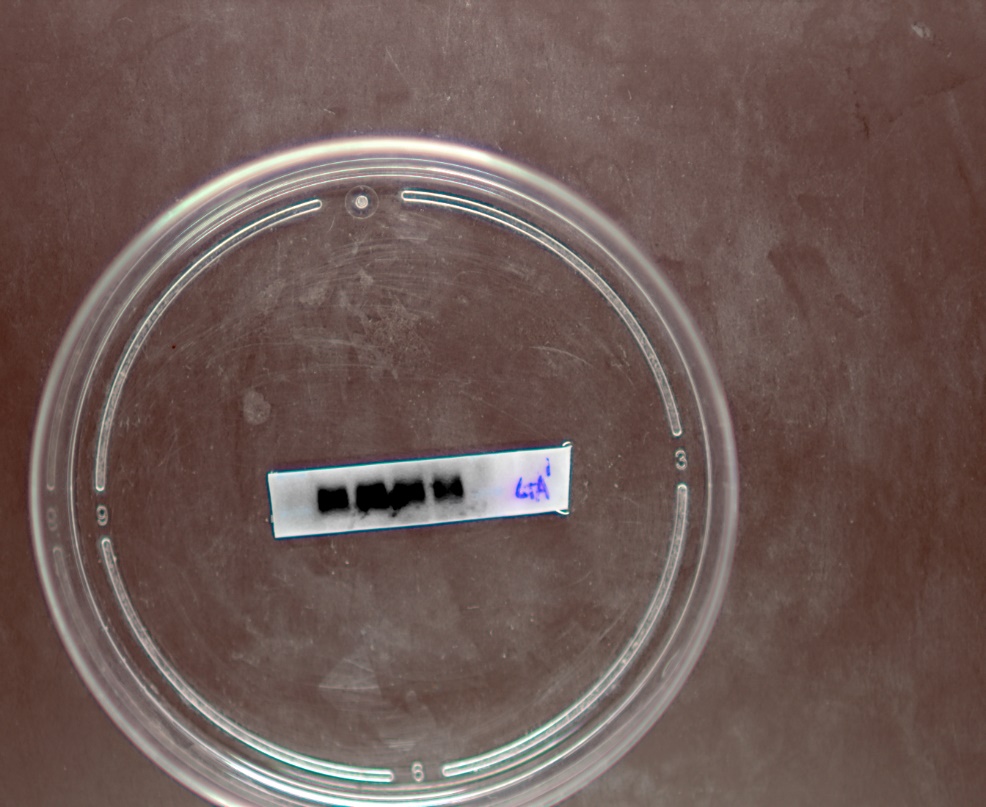
**

**3.Full-length gel
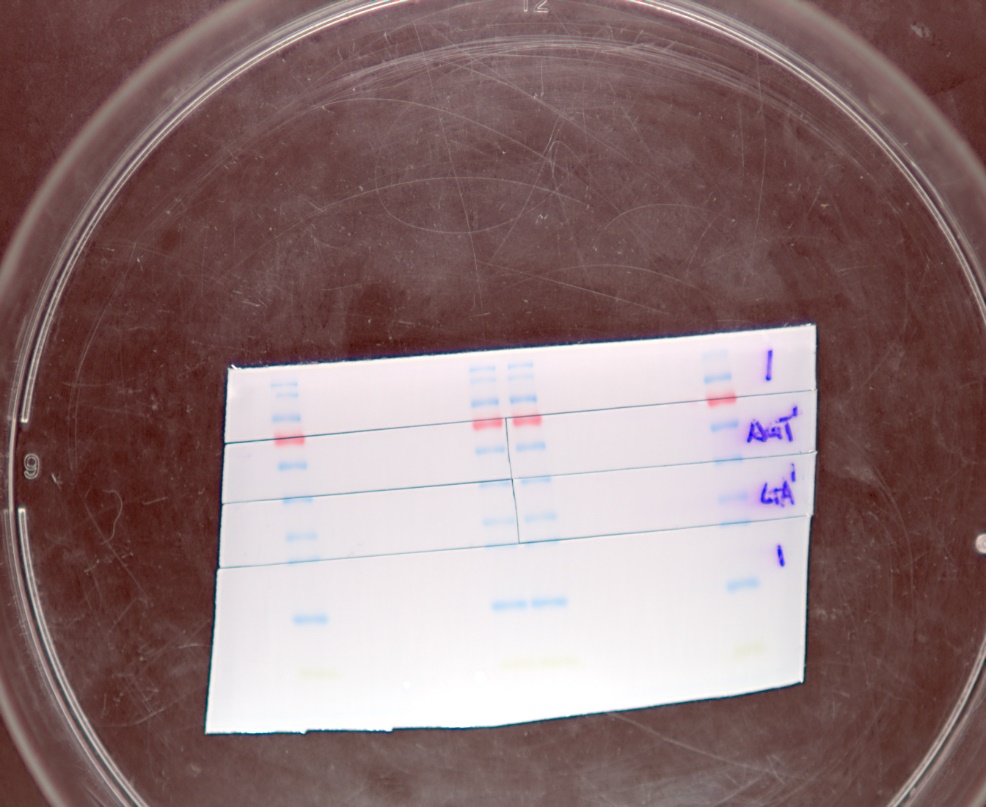
**

**六. Figure9-** **HMOX1**

**1. Figure 9B , panel 1 (HMOX1)
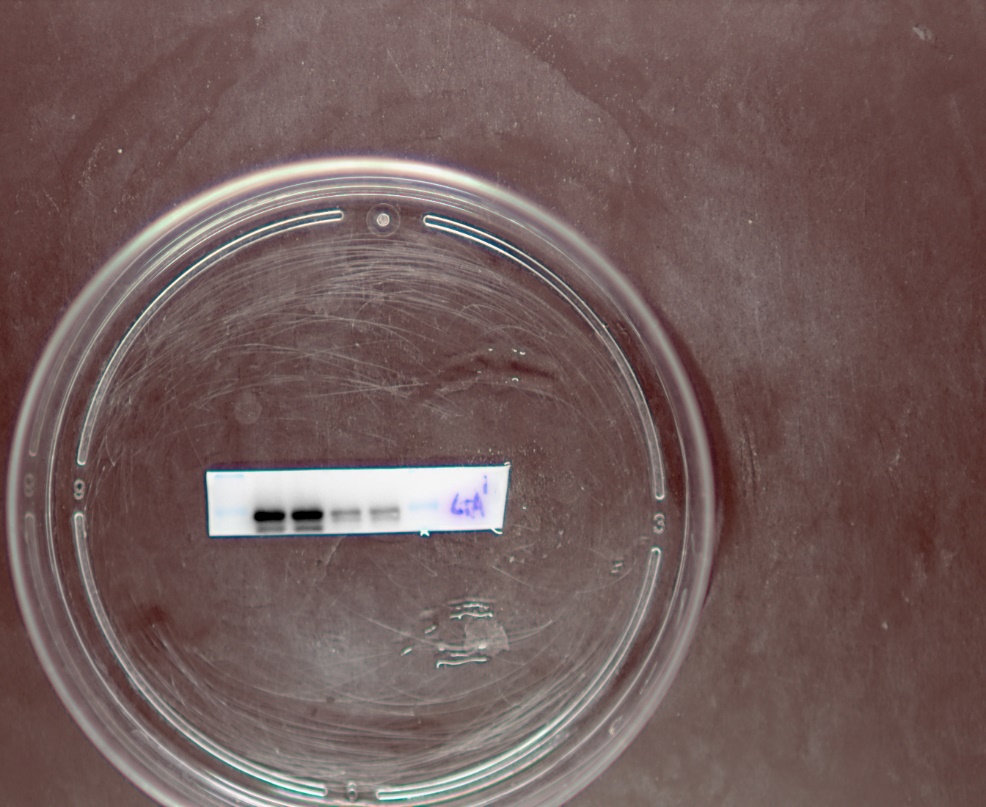
**

**2. Figure 9B , panel 2 (GAPDH)
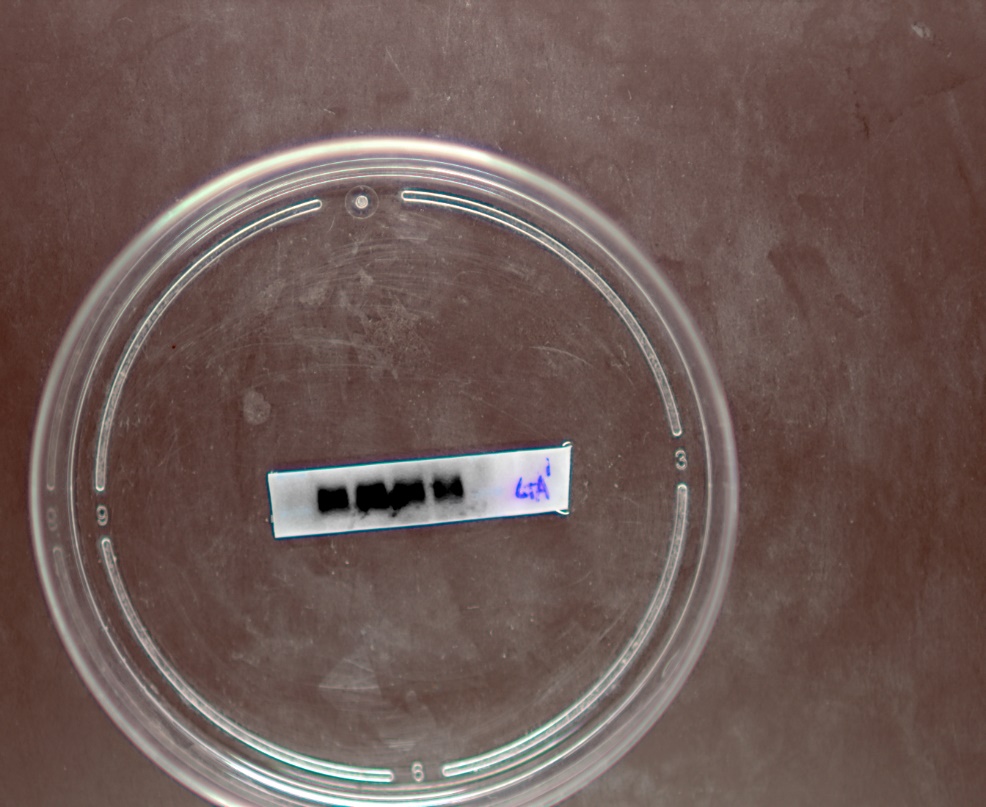
**

**3. Full-length gel
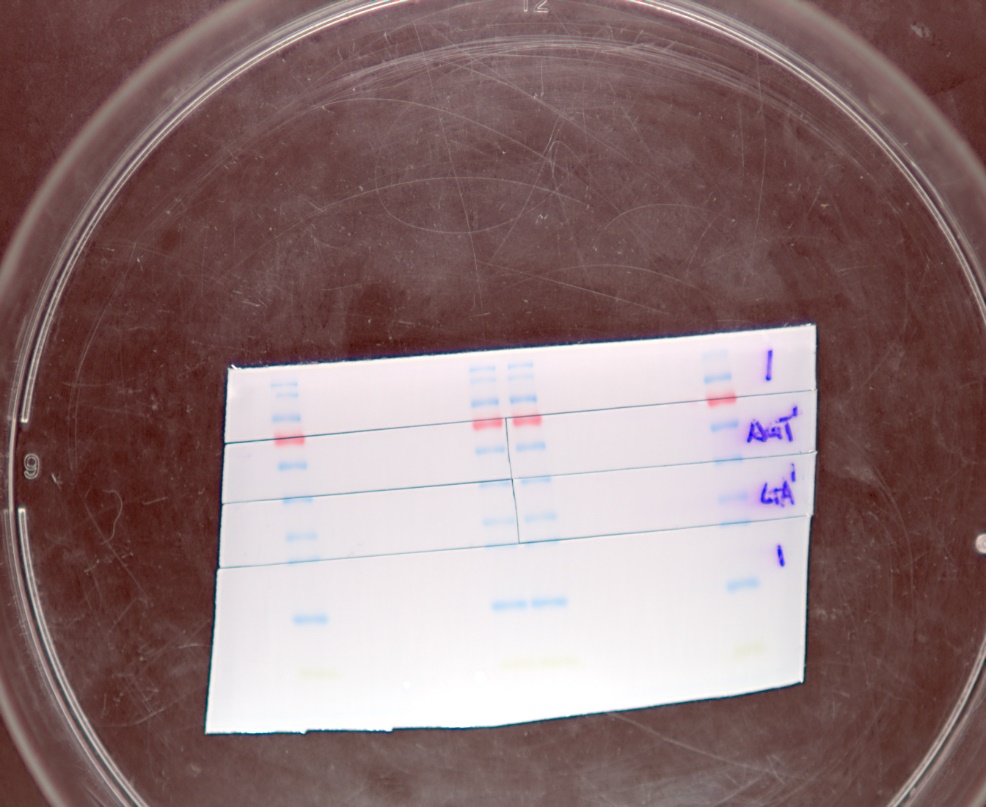
**
